1 **Serum extracellular vesicles trace COVID-19 progression and immune**  
2 **responses**

3

4

5 Kevin Ho Wai Yim<sup>1</sup>, Simone Borgoni<sup>1</sup> and Richard Chahwan<sup>1\*</sup>

6

7

8 <sup>1</sup> Institute of Experimental Immunology, University of Zurich, Zurich, Switzerland

9

10

11

12

13 \* **Corresponding author:** Richard Chahwan ([chahwan@immunology.uzh.ch](mailto:chahwan@immunology.uzh.ch))

14

15

16 **Keywords:** COVID-19, SARS-CoV-2, extracellular vesicles, diagnosis, clinical liquid biopsy

17

18

19 **Word count:** ~ 5052

20

21

22 **ABSTRACT**

23 Coronavirus disease 2019 (COVID-19) has transformed very quickly into a world pandemic with  
24 severe and unexpected consequences on human health. Concerted efforts to generate better  
25 diagnostic and prognostic tools have been ongoing. Research, thus far, has primarily focused  
26 on the virus itself or the direct immune response to it. Here, we propose extracellular vesicles  
27 (EVs) from serum liquid biopsies as a new and unique modality to unify diagnostic and  
28 prognostic tools for COVID-19 analyses. EVs are a novel player in intercellular signaling  
29 particularly influencing immune responses. We herein show that innate and adaptive immune  
30 EVs profiling, together with SARS-CoV-2 Spike S1<sup>+</sup> EVs provide a novel signature for COVID-  
31 19 infection. It also provides a unique ability to trace the co-existence of viral and host cell  
32 signatures to monitor affected tissues and severity of the disease progression. And provide a  
33 phenotypic insight into COVID-associated EVs.

34

35

36

## 37 INTRODUCTION

38 Coronavirus disease 2019 (COVID-19) was first identified in December 2019 in Wuhan, China.

39 The disease progressed into a global pandemic with over 64 million confirmed cases and over

40 3.9 million confirmed deaths as of June 2021<sup>[1]</sup>. COVID-19 patients can be asymptomatic, suffer

41 from mild symptoms such as fever, cough, and dyspnea or develop into severe conditions

42 characterized as acute respiratory distress syndrome (ARDS) requiring mechanical ventilation<sup>[2]</sup>.

43 SARS-CoV-2, a positive-sense, single-stranded RNA virus, is known as the causative pathogen

44 of COVID-19. The commonly acknowledged mechanism of SARS-CoV-2 pathology is the entry

45 of viruses into angiotensin-converting enzyme 2 (ACE2) expressing host cells, with a tropism for

46 different organs, such as the respiratory tract, kidneys, liver, heart, brain, and blood vessels<sup>[3]</sup>.

47 SARS-CoV-2 infected cells can recruit different immune cell types and induce innate

48 inflammatory responses as well as adaptive immune responses mediated by targeted

49 antibodies. Sars-CoV-2 specific immunoglobulins (Ig) types M, A, and G have been used as an

50 indicator of protective immunity in infected patients. However, such antibody responses

51 normally emerge around 10 to 21 days after infection and may take even longer (four weeks or

52 more) in mild cases to be detected<sup>[4]</sup>. In general, around 5 % of COVID-19 patients develop

53 severe conditions like ARDS, which arises around one week after symptom onset. Therefore,

54 SARS-CoV-2 specific antibody titer measurement is not the best predictor of severe disease for

55 infected patients who show mild symptoms early after infection but rapidly develop ARDS.

56 Extracellular vesicles (EVs) are nanosized lipid-bilayer vesicles that carry nucleic acid and

57 protein cargo. They are constitutively secreted by virtually all types of cells and circulate in most

58 biofluids such as blood, urine, saliva, and breast milk. Since the surface markers and molecular

59 cargo of EVs can reflect the cellular origin and activation status, they have been utilized as non-

60 invasive biomarkers from liquid biopsies in the past decade, for diagnostic and prognostic

61 purposes<sup>[5-7]</sup>. Thanks to the lipid-bilayer structure of EVs, they are intrinsically more stable than

62 naked circulating molecules such as antibodies and cytokines, conferring a higher potential to

63 provide a more robust and long-lasting effect on the host immune response. Here, we  
64 characterized serum EVs from healthy donors, early COVID-19 patients (< 13 days from  
65 symptom onset), and late COVID-19 patients with mild disease (> 13 days from symptom onset),  
66 in terms of size distribution, concentration and surface marker profile using nanoparticle flow  
67 analyzer (NanoFCM<sup>®</sup>) [8]. Cluster analysis of different EVs subpopulations based on surface  
68 marker expression was performed to identify signatures of healthy donors, early COVID-19 and  
69 late COVID-19 patients. Lastly, COVID-19 specific SARS-CoV-2 Spike S1<sup>+</sup> serum EVs were  
70 characterized in relation to disease progression and host immune responses to determine  
71 disease severity.

72

73

## 74 **RESULTS**

### 75 *Multiplex profiling of serum EVs derived from mild COVID-19 patients*

76 To explore the landscape of serum immune EVs during SARS-CoV-2 infection, we sampled a  
77 cohort of 20 mild COVID-19 patients and 17 healthy donors (Table 1). According to the WHO  
78 definition (World Health Organization, 2020), all the sampled COVID-19 patients in this study  
79 experienced mild illness with symptoms such as fever, fatigue, or dyspnea. Serum EVs were  
80 isolated from the whole blood of donors and patients. Purified serum EVs were analyzed by  
81 nanoparticle analyzer to examine the size distribution and concentration of different serum EVs  
82 subsets with a dedicated panel of immune markers and tetraspanins marker (Fig. 1A).

83 According to MISEV 2018 guideline, the physical properties of EVs, such as particle size  
84 distribution and concentration were analyzed to ensure the reproducibility of the result.  
85 Moreover, for diagnostic interest, potential variance in particle size distribution of different serum  
86 EVs subsets between healthy controls and COVID-19 patients might provide valuable predictive  
87 information (Fig. S1a). Using a mixture of four different sizes (66, 91, 113, 155 nm) of  
88 monodisperse silica nanoparticles (refractive index = 1.461), we applied 4 size interval bins

89 based on the 4 separated side-scatter burst areas to quantify the approximate size distribution  
90 of serum EVs, abbreviated as small, medium, large, extra-large accordingly (Fig. S1b). In  
91 COVID-19 patients small EVs were more enriched, and CD66b<sup>+</sup> EVs showed an increase  
92 compared to healthy controls ( $p < 0.05$ ,  $p < 0.01$  respectively). However, extra-large EVs were  
93 reduced in CD63<sup>+</sup>, CD38<sup>+</sup>, IgA<sup>+</sup>, IgG<sup>+</sup> EVs in COVID-19 patients compared to healthy controls ( $p$   
94  $< 0.05$ ) (Fig. 1B, C, S1d).

95 Immune cells profiling of COVID-19 patients revealed numerous alterations in both innate and  
96 adaptive immunity. However, whether immune cells derived EVs were influenced by COVID-19  
97 or involved in any form of disease specific responses remains unknown. Canonical leukocyte  
98 marker CD45 was first examined in patient serum EVs to gain an overview of immune EVs  
99 changes in COVID-19. Interestingly, CD45<sup>+</sup> serum EVs showed a significant reduction in mild  
100 COVID-19 patients compared to healthy control (Fig. S1c). We next visualized the alteration of  
101 CD45<sup>+</sup> EVs levels against days post symptoms onset. Significant depletion in CD45<sup>+</sup> EVs in  
102 patients between 3 to 13 days post symptoms onset was observed compared to healthy  
103 controls ( $p < 0.05$ ). Strikingly, patients after 13 days post symptoms onset displayed a recovery  
104 of CD45<sup>+</sup> EVs level comparable to healthy controls. This finding highlighted the importance to  
105 dissect the analysis into pre- and post-13 days post symptoms onset to gain more precise  
106 perspectives in the serum EVs dynamics in COVID-19. Interestingly, depletion of CD45<sup>+</sup> EVs in  
107 the early onset of COVID-19 correlated to CD45<sup>+</sup> cells deficiency observed in severe COVID-19  
108 patients reported by another study <sup>[9]</sup>, indicating the high sensitivity and early detection capacity  
109 of EVs based diagnostics. Total EVs concentration did not show significant differences  
110 suggesting the alteration in CD45<sup>+</sup> EVs level was independent of total EVs production during  
111 SARS-CoV-2 infection (Fig. 1C, D). The correlation between sizes and markers in EVs subsets  
112 between healthy controls and COVID-19 patients was visualized by Spearman's rank correlation  
113 matrix (Fig. 1E). A significant correlation of large and extra-large CD31<sup>+</sup> EVs (predominantly  
114 expressed by endothelial tissues) and total EVs was observed in healthy controls and post-13

115 days patients but not in pre-13 days patients. There was also a strong correlation between the  
116 small CD14<sup>+</sup>, CD19<sup>+</sup>, CD56<sup>+</sup> and CD63<sup>+</sup> EVs in pre-13 days patients which were not present in  
117 healthy controls nor post-13 days patients. These data suggest that classical monocytes-, B  
118 cells- and natural killer cells-derived small EVs are predominantly affected in the early stage of  
119 COVID-19.

120

#### 121 *Detection of SARS-CoV-2-Spike S1<sup>+</sup> serum EVs*

122 ACE2 containing EVs have been reported to prevent infection by SARS-CoV-2 virus indicating  
123 the relevance of EVs in COVID-19 progression<sup>[10]</sup>. Moreover, SARS-CoV-2 Spike S1 containing  
124 EVs have been shown to serve as decoys for neutralizing antibodies<sup>[11]</sup>. To explore whether  
125 SARS-CoV-2 utilizes such strategies to influence disease progression and interaction with the  
126 host, we attempted to detect and profile Spike S1<sup>+</sup> serum EVs in this cohort of patients. To  
127 eliminate the possibility of virus contamination in serum EVs purification, viral RNA detection by  
128 PCR was performed with patients' serum and none of the specimens tested positive. Specificity  
129 of Spike S1 antibody has been validated with negative control HEK293A and Spike S1  
130 transfected HEK293A and their released EVs, in combination with serial titration of staining  
131 cocktail with recombinant Spike S1 proteins (Fig. S2).

132 Spike S1<sup>+</sup> EVs were detected in a small subset of healthy controls, suggesting their serum EVs  
133 might be carrying cross-reactive epitopes that bind to Spike S1 antibodies used in the study. We,  
134 therefore, applied a cut-off of Spike S1 fluorescence signal at 1.75% of total particles to exclude  
135 all healthy controls. 5 out of 16 mild COVID-19 patients (dark blue dots in plots) had > 1.75%  
136 Spike S1<sup>+</sup> serum EVs (classified as Spike S1<sup>+</sup> EVs positive), suggesting the existence of SARS-  
137 CoV-2 specific EVs in human serum which could subsequently influence disease progression  
138 (Fig. 2A). To further identify the origin of Spike S1<sup>+</sup> EVs, we co-stained Spike S1 with a panel of  
139 immune and endothelial markers since SARS-CoV-2 are known to significantly affect  
140 endothelial tissues in patients<sup>[12]</sup>. Notably, Spike S1<sup>+</sup>CD31<sup>+</sup> EVs levels were significantly

141 increased in pre-13 days COVID-19 group compared to healthy controls and post-13 days  
142 COVID-19, but not with the immune markers analyzed (Fig. S3). Elevated levels of endothelial  
143 markers including CD31 were reported in COVID-19<sup>[13]</sup>, and temporary stress triggers CD31<sup>+</sup>  
144 microparticle release<sup>[14]</sup>. These data suggest Spike S1<sup>+</sup> EVs likely originate from SARS-CoV-2  
145 infected endothelial tissues. Total CD31<sup>+</sup> EVs level also showed an elevating tendency in  
146 COVID-19 patients compared to healthy controls. Reduction of small Spike S1<sup>+</sup> EVs was also  
147 observed in post-13 days patients compared to pre-13 days patients (Fig. 2B).

148 To gain deeper insights into the relationship between serum EVs and disease status, we applied  
149 principal component analysis of serum EVs subset level across the cohort (Fig. 2C). A biplot  
150 revealed the contribution of different EVs subsets as arrows showing the significant association  
151 of CD45<sup>+</sup> EVs and healthy controls. A quartile was dominated by pre-13 days patients and  
152 highly associated with Spike S1<sup>+</sup> EVs. A quartile with mostly post-13 days was defined by high  
153 levels of CD31<sup>+</sup> and CD63<sup>+</sup> EVs. In another quartile, a heterogeneous mix of predominantly  
154 healthy controls was defined by high levels of CD4<sup>+</sup>, CD14<sup>+</sup>, CD19<sup>+</sup> and CD56<sup>+</sup> EVs. Individuals  
155 PCA clustering allowed the stratification of disease status based on frequencies of different EVs  
156 subsets across the cohort. Taken together, despite the anticipated diversity across individuals  
157 and less pronounced phenotypes in mild COVID-19 compared to severe ones, these  
158 exploratory analyses enable the usage of serum EVs to predict disease status on top of  
159 canonical clinical approaches (Fig. 2D).

160 To further probe the alterations of different serum EVs subsets during COVID-19, we applied  
161 hierarchical clustering in a correlation map of serum EVs subsets across the cohort (Fig. 2E). In  
162 the healthy controls group, specialized immune cell derived EVs, CD4<sup>+</sup>, CD14<sup>+</sup>, CD19<sup>+</sup> and  
163 CD56<sup>+</sup> EVs had a strong positive correlation with each other but negatively correlate with CD45<sup>+</sup>  
164 EVs, suggesting, in healthy state, immune EVs are less likely to originate from lymphocytes nor  
165 monocytes but other types of leukocytes (i.e., neutrophils, around 60% of leukocytes in blood).  
166 However, such negative correlation did not persist in COVID-19 patients, indicating the surge of

167 lymphocytes and monocytes driven responses during SARS-CoV-2 infection. Significant  
168 positive correlation was also observed between CD38<sup>+</sup> and IgG<sup>+</sup> EVs in healthy controls but not  
169 in any COVID-19 group. In the pre-13 days mild COVID-19 group, CD31<sup>+</sup> and CD63<sup>+</sup> EVs  
170 started to positively correlate with specialized immune EVs. Strong positive correlation of Spike  
171 S1<sup>+</sup> and Spike S1<sup>+</sup>CD31<sup>+</sup> EVs and negative correlation of CD19<sup>+</sup> and CD66b<sup>+</sup> EVs were also  
172 observed. In the post-13 days mild COVID-19 group, the strong positive correlation between  
173 specialized immune EVs was reduced as well as the correlation of Spike S1<sup>+</sup> and Spike  
174 S1<sup>+</sup>CD31<sup>+</sup> EVs. In the overall mild COVID-19 group, regardless of time after symptoms onset,  
175 specialized immune EVs positively correlate with CD31<sup>+</sup> EVs and Spike S1<sup>+</sup> EVs also positively  
176 correlate with Spike S1<sup>+</sup>CD31<sup>+</sup> EVs. In summary, the analysis of serum EVs cluster signatures  
177 in relation to disease status and time after symptoms onset uncovered the dynamic patterns of  
178 serum EVs subset levels during COVID-19 progression.

179

#### 180 *Abundance of SARS-CoV-2-Spike S1 serum EVs indicate host immunological responses*

181 To better understand the dynamics of Spike S1<sup>+</sup> EVs during SARS-CoV-2 infection, we  
182 visualized the alteration of Spike S1<sup>+</sup> and Spike S1<sup>+</sup>CD31<sup>+</sup> EVs across the cohort against time  
183 after symptoms onset (Fig. 3A). Spike S1<sup>+</sup> EVs positive patients were present mostly in pre-13  
184 days post symptoms onset, two of which from day 10 showed high Spike S1<sup>+</sup>CD31<sup>+</sup> EVs (Fig.  
185 3A). To explore the immunological relevance of serum Spike S1<sup>+</sup> EVs during COVID-19  
186 progression, we analyzed the SARS-CoV-2 specific immunoglobulins levels across the cohort  
187 and in relation to time after symptoms onset (Fig. 3B). SARS-CoV-2 specific IgA and IgG levels  
188 were below 0.6 G/l in all healthy controls and showed an increasing trend close to 10 days post  
189 symptom onset (Fig. 3B, 3C). Two of the Spike S1<sup>+</sup> EVs positive patients at day 10 showed  
190 elevated levels of SARS-CoV-2 specific IgA and IgG (up to 24 and 3 G/l respectively) which are  
191 predominantly observed in severe COVID-19 cases, suggesting the dynamics Spike S1<sup>+</sup> EVs  
192 levels in patients could provide sensitive detection of alternated immunological responses.



193 Levels of immunosuppressive cytokine IL-10<sup>[15]</sup>, one of the hallmarks observed in severe  
194 COVID-19 was compared across the cohort. IL-10 levels were comparable between healthy  
195 controls and COVID-19 patients, indicating cytokine secretion was not significantly affected in  
196 this cohort of mild COVID-19 patients (Fig. 3D).

197 To further understand the relationship between Spike S1<sup>+</sup> EVs and other significantly altered  
198 factors between healthy controls and COVID-19 patients, we performed direct correlation  
199 analysis between the levels of Spike S1<sup>+</sup> EVs and Spike S1<sup>+</sup>CD31<sup>+</sup> EVs, viral specific  
200 immunoglobulins (IgG1 and IgG3) and immunosuppressive IL-10 (Fig. 3E). A strong positive  
201 correlation was observed between Spike S1<sup>+</sup> EVs and Spike S1<sup>+</sup>CD31<sup>+</sup> EVs ( $r = 0.6$ ,  $p = 0.017$ ),  
202 suggesting the Spike S1<sup>+</sup> EVs are likely to originate from endothelial tissues. We also found a  
203 strong negative correlation between Spike S1<sup>+</sup> EVs and IgG1 ( $r = -0.46$ ,  $p = 0.036$ ) and IgG3 ( $r$   
204  $= -0.75$ ,  $p = 0.0013$ ). In contrast to SARS-CoV-2 specific IgA and IgG, IgG1 and IgG3 are  
205 predominantly induced by viral infection, with IgG3 appearing first during infection<sup>[16]</sup>. These  
206 negative correlations indicate levels of Spike S1<sup>+</sup> EVs could estimate whether the host antibody  
207 mediated responses are SARS-CoV-2 specific. Another negative correlation was observed  
208 between Spike S1<sup>+</sup> EVs and immunosuppressive IL-10, suggesting patients with higher Spike  
209 S1<sup>+</sup> EVs are less prone to immunosuppression of the immune system and possibly a lower  
210 chance of disease deterioration.

211

#### 212 *Mild COVID-19 patients derived serum EVs affect healthy PBMCs responses ex vivo*

213 Immune cells derived soluble factors such as IFN- $\gamma$ , IL6, and TNF are known to cause  
214 inflammation in severe COVID-19 cases and subsequently cause complications in the disease.  
215 Since EVs have been shown to modulate immune responses in viral infection, we sought to  
216 explore the possibility of EVs mediated immune regulation in COVID-19. B cells mediated  
217 antibodies neutralization and T cells mediated cytokines production are the key drivers of host  
218 immune defenses against COVID-19, understanding B and T cells responses in the presence of

219 purified serum EVs from the cohort would enable us to better understand the immune regulatory  
220 network in COVID-19. To understand such mechanism, we activated healthy PBMC CD19<sup>+</sup> B  
221 cells (with IL-4 and IL-21) and CD3<sup>+</sup> T cells (anti-CD3/CD28 and PMA/Ionomycin) *ex vivo* in the  
222 presence of PBS control and purified serum EVs across the cohort. Cell viability, activation,  
223 antibodies class switching (in B cells), and cytokine production (in T cells) were measured 4  
224 days after activation by flow cytometry (Fig. 4A).

225 Viability of CD19<sup>+</sup> B cells was consistent across the serum EVs in the cohort. Activation marker  
226 CD86 expression was reduced in pre-13 days COVID-19 derived EVs compared to both healthy  
227 controls and post-13 days COVID-19 derived EVs, suggesting serum EVs from pre-13 days  
228 suppress B cells activation. IgM expression was similar across the serum EVs in the cohort  
229 while IgA expression was significantly increased in post-13 days COVID-19 EVs, implying post-  
230 13 days COVID-19 EVs promote antibodies class switching.

231 Viability of CD4<sup>+</sup> T cells was reduced in pre-13 days COVID-19 derived EVs compared to post-  
232 13 days COVID-19 derived EVs but not observed in CD8<sup>+</sup> T cells. Activation marker CD69  
233 expression in CD4<sup>+</sup> and CD8<sup>+</sup> T cells was similar across the serum EVs in the cohort. Significant  
234 reduction of TNF production in CD4<sup>+</sup> T cells was observed in pre-13 days COVID-19 EVs, with a  
235 reducing tendency in post-13 days COVID-19 EVs compared to healthy controls. However, TNF  
236 production in CD8<sup>+</sup> T cells was comparable across the serum EVs in the cohort, suggesting  
237 CD4<sup>+</sup> T cells are more susceptible to serum EVs modulation. IFN- $\gamma$  production of CD4<sup>+</sup> and  
238 CD8<sup>+</sup> T cells was increased in pre-13 days COVID-19 EVs compared to both healthy controls  
239 and post-13 days COVID-19 derived EVs. Taken together, serum EVs from COVID-19 patients  
240 are capable to influence B and T cells responses in a targeted manner that possibly contribute  
241 to the immune phenotypes observed in COVID-19 patients (Fig. 4B).

242

243

244 **DISCUSSION**

245 Throughout the COVID-19 pandemic, immune cell-profiling studies continue showing a wide  
246 spectrum of immunological complications from mild to severe cases such as lymphopenia,  
247 hyper inflammation and series of cytokine storms. Aside from studied soluble immune factors  
248 like antibodies and cytokines, EVs are emerging as novel and potent intercellular signaling  
249 mediators. EV cargos are under study as predictive tools for COVID-19 severity<sup>[17-19]</sup>. However,  
250 such recent studies required mass spectrometry and RNA-seq of EVs cargo which is not easy  
251 to convert into routine clinical diagnostics due to the tedious processing and high expertise  
252 required. Or they studied covid related EVs *ex vivo* <sup>[11]</sup>. We focus here on i) serum immune-  
253 derived EVs because immune cells are predominantly found in the bloodstream, as are their  
254 released EVs; ii) viral-specific EVs to gain specificity and viral tracking ability; iii) on analyzing  
255 early- and late- mild covid patients to study the effect of the virus with minimal symptom  
256 complications; and iv) attributing phenotypic functions for COVID-19 associated EVs. Therefore,  
257 our analysis has consequences that surpass the basic investigation of COVID-19 biomarkers  
258 per se and instead tries to trace the dynamic response of the virus and our body's response to it.  
259

260 To harness the full potential of immune EVs in COVID-19, we applied multi-parametric EVs  
261 phenotyping to characterize total EVs and specific immune associated subsets. The high  
262 sensitivity and resolution of NanoFCM<sup>®</sup> used in this study allowed the possibility of direct single  
263 EVs phenotyping. We could simultaneously measure and correlate EV size, concentration and  
264 marker subset quantification; surpassing the conventional antibody coated beads approach  
265 currently used<sup>[20]</sup>. General enrichment of small EVs (~ 66 nm) in mild COVID-19 patients was  
266 observed and more evident in total serum EVs and CD66b<sup>+</sup>, CD38<sup>+</sup>, IgA<sup>+</sup>, IgG<sup>+</sup> EVs.  
267 Interestingly, such enrichment of small EVs seems to correlate with reduction in extra-large EVs  
268 (~ 155 nm) and is more pronounced in CD63<sup>+</sup> EVs and CD66b<sup>+</sup> EVs. Immunological studies  
269 have shown inflammatory phenotypes in granulocytes (expressing CD66b) are one of the  
270 strongest discriminators between non-infected and infected individuals as well as between

271 severity status of COVID-19 patients<sup>[21]</sup>. The size shifts we observed correspond to the  
272 moderate enrichment of smaller EVs due to cellular stress reported by others<sup>[22]</sup>. Our results  
273 suggest that EV's biogenesis machinery in general especially granulocytes may have been  
274 altered by SARS-CoV-2 infection causing cellular stress. Although the underlying mechanism of  
275 such phenotype is yet to be determined, it is conceivable that this is partly due to the interaction  
276 between SARS-CoV-2 and the endosomal sorting complexes required for EV transport<sup>[23]</sup>.  
277 Moreover, size distribution correlation maps revealed a strong positive association between  
278 small specialized immune cells derived EVs (CD14<sup>+</sup>, CD19<sup>+</sup>, CD56<sup>+</sup>; classical monocytes, B  
279 cells, NK cells) in pre-13 days after symptoms onset, suggesting these immune compartments  
280 were potentially more stressed in the early phase of COVID-19. Another highlight in our study is  
281 the depletion of leukocyte-derived CD45<sup>+</sup> EVs in early phase of mild COVID-19 (pre-13 days).  
282 Although our EV data is supported by studies measuring CD45 cell counts<sup>[9]</sup>, we also observed  
283 a recovery of CD45<sup>+</sup> EV levels in the latter phase of mild COVID-19 (post-13 days). Given the  
284 predominant 14 days COVID-19 isolation guidelines<sup>[24]</sup>, and the fact that these patients were all  
285 mildly symptomatic our data bolsters the ability of our study to dynamically trace covid19  
286 progression based on immune EVs. This also may reflect the partial recovery of host immune  
287 systems as reflected by serum EVs markers. It is worth noting that by combining pre- and post-  
288 13 days data these small dynamic immune changes can counter-weight each other and be lost  
289 to measurements, which suggest that future work should consider infection time or disease  
290 onset as a factor. Moreover, biplot cluster analysis showed insignificant variance of EVs subsets  
291 distribution between age groups and sex of donors (Fig. S4).

292

293 Engineered EVs expressing SARS-CoV-2 antigens, such as ACE2 and Spike S1, have been  
294 shown to perform potent functions in inhibiting coronavirus infection and serving as decoys for  
295 neutralizing antibodies, respectively<sup>[10,11]</sup>. These findings not only prove the potential relevance  
296 of EVs in COVID-19 progression but also highlight the possibility of SARS-CoV-2 utilizing EVs

297 as an intermediate driver for replication and interplay with host immune defenses. Within our  
298 cohort of mild COVID-19 patients, almost one-third showed significantly elevated Spike S1<sup>+</sup> EVs  
299 level in our platform when compared to healthy controls. The existence of Spike S1<sup>+</sup> EVs in  
300 patients' serum – which we show for the first time and which seems to peak 8-12 days post  
301 symptoms – strongly support the potential of SARS-CoV-2 exploiting host EVs to act as decoys  
302 for neutralizing antibodies and evade from the host immune surveillance and specific responses  
303 as anticipated in an *in vitro* study of artificial Spike S1<sup>+</sup> EVs<sup>[11]</sup>. Moreover, the possibility to  
304 detect SARS-CoV-2 Spike S1 marker from patients' serum EVs and profile their dynamics  
305 during course of infection provided a novel tool for disease specific EVs phenotyping in both  
306 research and clinical applications, especially in monitoring life-threatening severe COVID-19  
307 progression. Throughout our panel of immune markers and endothelial marker co-stained with  
308 Spike S1 across the cohort, Spike S1<sup>+</sup>CD31<sup>+</sup> EVs levels were significantly altered in pre-13  
309 days COVID-19 compared to healthy controls. These data support the notion that endothelial  
310 tissues (predominantly expressing CD31) were significantly influenced by SARS-CoV-2 infection,  
311 but also suggesting a notable amount of Spike S1<sup>+</sup> EVs originate from endothelial tissues.  
312 Further studies with staining of additional markers as well as future development on high  
313 dimensional single EVs analysis shall provide a more conclusive representation of serum EVs  
314 subsets distribution not only in COVID-19, but also other viral infections and diseases.

315 Within our dataset, a global PCA analysis of analyzed EVs subsets distribution across the  
316 cohort displayed a clear stratification between healthy controls, pre-, and post- 13 days of  
317 COVID-19. The partial overlap between pre-13 and post-13 days revealed the core serum EVs  
318 features associated with the SARS-CoV-2 infection and might be explained by the 'long COVID'  
319 observed in other follow-up studies<sup>[25,26]</sup>. Despite the overlap, post-13 days COVID-19 were less  
320 separated from pre-13 days COVID-19 indicating the gradual normalization of analyzed serum  
321 EVs, possibly associated with their parental cells and tissues. From the correlation clustering of  
322 EVs subsets across the cohort, we could show distinct serum EVs signatures that enable

323 differentiation between healthy controls and COVID-19 patients as well as tracing the  
324 progression of COVID-19.

325 Furthermore, correlation of Spike S1<sup>+</sup> EVs and SARS-CoV-2 specific IgA, IgG, IL-10, IgG1 and  
326 IgG3 revealed the clinical implications of Spike S1<sup>+</sup> EVs levels in the context of host immune  
327 responses and disease progression. Within our dataset, Spike S1<sup>+</sup> EVs positive patients tend to  
328 show higher SARS-CoV-2 specific antibody responses and lower levels of immunosuppressive  
329 IL-10, which in theory, should result in less disease deterioration. Negative correlation between  
330 Spike S1<sup>+</sup> EVs and generic viral induced IgG1 and IgG3 responses<sup>[16]</sup> implies that Spike S1<sup>+</sup>  
331 EVs levels could indicate the chances of developing SARS-CoV-2 specific responses in an early  
332 predictive manner, and subsequently, enable more precise and prompt treatment decision in the  
333 clinics.

334  
335 Our functional assay of purified serum EVs in *ex vivo* PBMC B and T cells activation  
336 demonstrated novel perspectives of the biological relevance and influences of COVID-19  
337 derived serum EVs. The significant increase in IgA<sup>+</sup> B cells in the presence of post-13 days  
338 COVID-19 EVs indicates certain EV subsets derived from later phase of COVID-19, are partially  
339 facilitating B cell antibody class switching during COVID-19 progression. Our dataset also aligns  
340 with the elevated IFN- $\gamma$  levels observed in severe COVID-19 patients<sup>[27]</sup>, IFN- $\gamma$  enrichment in  
341 CD4<sup>+</sup> T cells in the presence of pre-13 days COVID-19 EVs but not post-13 days COVID-19  
342 EVs. This dataset suggests that early in SARS-CoV-2 infection, infected host cells were  
343 possibly reprogrammed to produce certain EVs subsets to promote inflammatory IFN- $\gamma$   
344 production in CD4<sup>+</sup> T cells. Interestingly, despite TNF elevation were observed in other clinical  
345 studies of severe COVID-19 patients<sup>[28]</sup>, we found significant depletion of TNF in CD4<sup>+</sup> T cells in  
346 the presence of pre-13 days COVID-19 EVs, suggesting serum EVs from early phase of  
347 COVID-19 are suppressive for TNF production in CD4<sup>+</sup> T cells. Taken together, our findings

348 provide an initial stepping-stone for the field to understand EVs signaling mediated COVID-19  
349 progression.

350  
351 With the rather small cohort size and limited markers combinations, the predictive values of  
352 serum EVs could be further bolstered and fully exploited in clinical applications. Future work  
353 shall consider increasing the size of cohort with the addition of severe patients from various  
354 group cohorts including age, sex, genetic, geographical background, and treatment courses.  
355 Moreover, to enhance the diagnostic and prognostic specificity of serum EVs in COVID-19,  
356 future work shall include sampling from non-SARS-CoV-2 infected individuals such as seasonal  
357 influenza patients. This approach will allow us to better stratify the EVs subsets signatures  
358 between COVID-19 and general flu-like viral infections and ultimately fortify clinical predictive  
359 value of EVs. Indeed, future optimization of high-dimensional spectral analyzers for EVs  
360 characterization with the addition of more immune and viral markers will broaden our spectrum  
361 to better trace the dynamics of host immune responses as well as disease progression. In the  
362 therapeutic context, our functional assay demonstrated the feasibility of utilizing serum EVs from  
363 different disease severity to manipulate host immune responses. Nevertheless, identification of  
364 responsible EVs subsets and understanding their mode of action are essential for us to harvest  
365 their therapeutic potentials in the future.

366  
367 The dynamics of serum EVs subsets distribution highlighted their predictive values in the  
368 perspectives of overall host immune responses and correlation between disease specific Spike  
369 S1<sup>+</sup> EVs and immune responses during COVID-19 progression. The study strengthens the  
370 potential of serum EVs based diagnostic and prognostic, potentially therapeutic applications in  
371 COVID-19, and easily transferred to other types of viral infections and cancers.

372

373

## 374 MATERIALS AND METHODS

### 375 *Study subjects*

376 Peripheral blood was draw from healthy donors and COVID-19 patients recruited at the  
377 University Hospital Zurich (Switzerland) outpatient clinic. The patients were eligible if they were  
378 symptomatic at the time of inclusion, had a newly diagnosed SARS-CoV-2 infection confirmed  
379 by quantitative reverse-transcriptase polymerase chain reaction (RT-qPCR), and were over 18  
380 years old. Healthy donors (n = 17) were recruited as controls. All participants, patients and  
381 healthy controls, signed a written informed consent. This non-interventional, observational study  
382 was approved by the Cantonal Ethics Committee of Zurich (BASEC #2016-01440) and  
383 performed in accordance with the Declaration of Helsinki. The sample size was based on  
384 availability of the samples. Investigators were blinded to disease severity, while performing  
385 experiments. While the analysis was cross-sectional, the patient outcomes were recorded  
386 prospectively after inclusion. Standard clinical laboratory data (CRP, LDH, complete blood count  
387 with differential) was collected from the first day of hospitalization. Patients were classified  
388 according to WHO guidance into mild cases (n=20) in the same hospital laboratory. All healthy  
389 controls were tested for SARS-CoV-2 specific IgA and IgG antibodies, and all were below the  
390 diagnostic reference value. All patients received a standard clinical laboratory sampling and  
391 cytokines were measured. Furthermore, samples from 20 mild COVID-19 patients and all  
392 healthy subjects were processed for nano flow analysis and *ex vivo activation of PBMCs*. Briefly,  
393 3 – 5 mL of peripheral venous blood was collected from into BD Vacutainer serum clot activator  
394 10 ml (367896). After collection, tubes were left vertically undisturbed on the bench for 15  
395 minutes to allow blood clot and followed by centrifugation at 2,500 g for 10 mins at 4°C for  
396 separation of sera. The supernatant was collected into a new tube and the serum samples were  
397 stored at 4°C until use. Due to the limited number of available samples, certain serum samples  
398 did not have enough amount for all the immunostaining panels.

399



400 *Isolation of serum EVs for phenotyping analysis and functional assays*

401 1 mL of serum samples were first diluted with 9 mL of PBS and concentrated using Amicon®  
402 ultra-0.5 centrifugal filter devices (Millipore, Amicon® Ultra 100 K device) at 3,000 g for 30 mins  
403 at 4°C. Serum retentate (100 uL per patient) was diluted with 1.4 mL of PBS and subjected to  
404 centrifugation at 10,000 g for 30 mins at 4°C. The 10k pellet was resuspended in 1.5 mL PBS  
405 and subjected ultracentrifugation at 120,000 g for 90 mins at 4°C (F50L-24x1.5 rotor). The pellet  
406 was resuspended in 50 uL PBS and stored at 4°C until use.

407 *Nano flow analysis of serum EVs*

408 The configuration NanoFCM® used in the study was performed as described in another study<sup>[20]</sup>.  
409 10 uL of purified serum EVs were subjected to immunofluorescence staining using antibodies  
410 listed in supplementary materials (Table 1) at the concentration of 1 in 200 uL for 1 hour at 4°C  
411 covered in dark. Immuno-stained serum EVs were washed by ultracentrifugation at 120,000 g  
412 for 90 mins at 4°C, pellet was resuspended in 50 uL PBS for nano flow analysis. Monodisperse  
413 silica nanoparticles of four different sizes, with modal peak sizes of 66 nm, 91 nm, 113 nm and  
414 155 nm were used as the size reference standard to calibrate the size distribution of EVs.

415

416 *Ex vivo activation of PBMCs*

417 Buffy coats were obtained from Blutspende Zurich, Schlieren, Switzerland (BASEC #2019-  
418 00837). PBMCs were isolated using Ficoll-Paque density gradient centrifugation. CD19<sup>+</sup> B cells  
419 were isolated using STEMCELL EasySep™ Release Human CD19 Positive Selection Kit  
420 according to manufacturer's instruction. CD19<sup>+</sup> B cells were activated with both human  
421 recombinant IL-4 and IL-21 at 10 ng/mL (Biolegend). Remaining cell suspension were plated in  
422 RPMI-1640 media supplemented in 10% heat inactivated fetal bovine serum (FBS) (Sigma) and  
423 1% penicillin streptomycin/glutamine (Thermo) for 24 hours at 37°C, 5% CO<sub>2</sub>. Cells were  
424 collected at 300 g for 5 mins and stimulated with anti-CD3/CD28 beads at 1 bead per cell

425 (Thermo). 50 uL of purified serum EVs from healthy controls, pre-13 days and post-13 days mild  
426 COVID-19 were added to cultured cells together with stimulatory agents.

427  
428 *Cell cultures transfection and flow cytometry for SARS-CoV-2 Spike S1 staining controls*  
429 HEK293A cells were grown in 10 cm tissue culture dishes in DMEM (Sigma) supplemented with  
430 10% heat-inactivated FBS and 1% penicillin/streptomycin. To generate Spike S1 expressing  
431 HEK293A cells and EVs, we transfected HEK293A cells with pCMV14-3X-Flag-SARS-CoV-2 S  
432 plasmid (Addgene #145780) together with GFP plasmid (for transfection efficiency quantification)  
433 and EVs were collected 24 hours post transfection from conditioned medium using serial  
434 centrifugation as noted above. Transfection efficiency of HEK293A was measured by flow  
435 cytometry (BD Canto II) in the FITC channel. To test the antibody binding specificity, prior to  
436 immunostaining of Spike S1 on cells and EVs, molar ratios of 0:1, 1:1, 2:1, 5:1 of recombinant  
437 Spike S1 proteins (Sino Biological, #40591-V08H) were incubated with anti-Spike S1 for 30  
438 mins at 4°C to neutralize unbound antibodies. Resulting staining cocktail (with range of  
439 neutralizing recombinant Spike S1 proteins) were used to stain non-transfected and Spike S1  
440 transfected HEK293A and EVs for 1 hour at 4°C covered in dark. Spike S1 signals were  
441 detected by flow cytometry (HEK293A) and nano flow analyzer (EVs).

442  
443 *Data and statistical analysis*

444 Both cells and EVs flow cytometry data were exported as FCS files and analyzed using Flowjo  
445 software. Statistical analysis of clinical diagnostic and flow cytometry values were performed  
446 using Graphpad (version 9.1.1, GraphPad Software, La Jolla California USA). Ordinary One-  
447 way ANOVA, P-value < 0.05 was considered as statistical significance. PCA and biplot were  
448 generated with R software (version 4.0.1) using the package 'factoextra' and 'ggplot2'.  
449 Spearman's correlation analyses were produced using the corrplot package and implemented

450 hclust method. The correlations between different EVs subsets, and between different disease  
451 severity group were analyzed using non-parametric Spearman correlations. The significance  
452 threshold was set at  $\alpha < 0.05$ .

453

454

455

456 **ACKNOWLEDGMENT**

457 We sincerely thank Prof Onur Boyman and Dr Carlo Cervia for providing critical elements for  
458 this study including clinical samples, data, and insightful comments. We thank Dr Ben Peacock  
459 for NanoFCM sample support. RC is supported by BBSRC (BB/N017773/2), SNF (CRSK-  
460 3\_190550; IZSEZO\_204655), and the UZH Research Priority Program (URPP Translational  
461 Cancer Research). KY is supported by a Bio & MedTech Entrepreneur Fellowship.

462

463

464 **AUTHOR CONTRIBUTIONS**

465 KY and RC conceived the idea and coordinated the project. RC secured funding and guided the  
466 work. KY performed experiments and analyses. KY and SB performed in vitro experiments and  
467 statistical data analyses. KY wrote the manuscript draft, which was then finalized by KY and RC  
468 with the assistance of SB.

469

470

471 **DECLARATION OF INTERESTS**

472 All authors have declared that no conflict of interest exists.

473

474

475

476 **REFERENCES**

- 477 [1] E. Dong, H. Du, L. Gardner, *Lancet Infect. Dis.* **2020**, *20*, 533.
- 478 [2] Z. Wu, J. M. McGoogan, *JAMA - J. Am. Med. Assoc.* **2020**, *323*, 1239.
- 479 [3] V. G. Puelles, M. Lütgehetmann, M. T. Lindenmeyer, J. P. Sperhake, M. N. Wong, L.  
480 Allweiss, S. Chilla, A. Heinemann, N. Wanner, S. Liu, F. Braun, S. Lu, S. Pfefferle, A. S.  
481 Schröder, C. Edler, O. Gross, M. Glatzel, D. Wichmann, T. Wiech, S. Kluge, K. Pueschel,  
482 M. Aepfelbacher, T. B. Huber, *N. Engl. J. Med.* **2020**, *383*, 590.
- 483 [4] C. Cervia, J. Nilsson, Y. Zurbuchen, A. Valaperti, J. Schreiner, A. Wolfensberger, M. E.  
484 Raeber, S. Adamo, S. Weigang, M. Emmenegger, S. Hasler, P. P. Bosshard, E. De  
485 Cecco, E. Bächli, A. Rudiger, M. Stüssi-Helbling, L. C. Huber, A. S. Zinkernagel, D. J.  
486 Schaer, A. Aguzzi, G. Kochs, U. Held, E. Probst-Müller, S. K. Rampini, O. Boyman, *J.*  
487 *Allergy Clin. Immunol.* **2021**, *147*, 545.
- 488 [5] K. H. W. Yim, A. Al Hrouf, S. Borgoni, R. Chahwan, *Cancers (Basel)*. **2020**, *12*, 1.
- 489 [6] H. BF, B.-Y. G. M, W. S, L. JC, *Adv. Sci. (Weinheim, Baden-Wurttemberg, Ger.* **2020**, *7*,  
490 DOI 10.1002/ADVS.202002596.
- 491 [7] B. KA, Y. S. B, A. AD, M. M. P, W. M, M. PY, *Front. Immunol.* **2020**, *11*, DOI  
492 10.3389/FIMMU.2020.00022.
- 493 [8] S. AM, L.-I. E, G. A, D. A, D. G, P. B, O. X, S. N, F. KP, S. O, D. N, *J. Extracell. vesicles*  
494 **2021**, *10*, DOI 10.1002/JEV2.12130.
- 495 [9] M. Jin, N. Shi, M. Wang, C. Shi, S. Lu, Q. Chang, S. Sha, Y. Lin, Y. Chen, H. Zhou, K.  
496 Liang, X. Huang, Y. Shi, G. Huang, *Aging (Albany. NY)*. **2020**, *12*, 19867.
- 497 [10] F. Coccozza, N. Névo, E. Piovesana, X. Lahaye, J. Buchrieser, O. Schwartz, N. Manel, M.  
498 Tkach, C. Théry, L. Martin-Jaular, *J. Extracell. Vesicles* **2020**, *10*, DOI  
499 10.1002/jev2.12050.
- 500 [11] Z. Troyer, N. Alhusaini, C. O. Tabler, T. Sweet, K. I. L. Carvalho, D. M. Schlatzer, L.  
501 Carias, C. L. King, K. Matreyek, J. C. Tilton, *J. Extracell. Vesicles* **2021**, *10*, e12112.
- 502 [12] J. H. Levy, T. Iba, E. E. Gardiner, *Arterioscler. Thromb. Vasc. Biol.* **2021**, *41*, 1774.
- 503 [13] A. Birnhuber, E. Fliesser, G. Gorkiewicz, M. Zacharias, B. Seeliger, S. David, T. Welte, J.  
504 Schmidt, H. Olschewski, M. Wygrecka, G. Kwapiszewska, *Eur. Respir. J.* **2021**, 2100377.
- 505 [14] M. Lichtenauer, B. Goebel, M. Fritzenwanger, M. Förster, S. Betge, A. Lauten, H. R.  
506 Figulla, C. Jung, *Clin. Hemorheol. Microcirc.* **2015**, *61*, 83.
- 507 [15] H. Han, Q. Ma, C. Li, R. Liu, L. Zhao, W. Wang, P. Zhang, X. Liu, G. Gao, F. Liu, Y. Jiang,  
508 X. Cheng, C. Zhu, Y. Xia, *Emerg. Microbes Infect.* **2020**, *9*, 1123.
- 509 [16] G. Vidarsson, G. Dekkers, T. Rispens, *Front. Immunol.* **2014**, *5*, DOI

- 510 10.3389/fimmu.2014.00520.
- 511 [17] Y. Fujita, T. Hoshina, J. Matsuzaki, Y. Yoshioka, T. Kadota, Y. Hosaka, S. Fujimoto, H.  
512 Kawamoto, N. Watanabe, K. Sawaki, Y. Sakamoto, M. Miyajima, K. Lee, K. Nakaharai, T.  
513 Horino, R. Nakagawa, J. Araya, M. Miyato, M. Yoshida, K. Kuwano, T. Ochiya, *J.*  
514 *Extracell. Vesicles* **2021**, *10*, e12092.
- 515 [18] K. Mao, Q. Tan, Y. Ma, S. Wang, H. Zhong, Y. Liao, Q. Huang, W. Xiao, H. Xia, X. Tan, P.  
516 Luo, J. Xu, D. Long, Y. Jin, *Cell Death Dis.* **2021**, *12*, 541.
- 517 [19] C. Balbi, J. Burrello, S. Bolis, E. Lazzarini, V. Biemmi, E. Pianezzi, A. Burrello, E.  
518 Caporali, L. G. Grazioli, G. Martinetti, T. Fusi-Schmidhauser, G. Vassalli, G. Melli, L.  
519 Barile, *EBioMedicine* **2021**, *67*, 103369.
- 520 [20] Y. Tian, M. Gong, Y. Hu, H. Liu, W. Zhang, M. Zhang, X. Hu, D. Aubert, S. Zhu, L. Wu, X.  
521 Yan, *J. Extracell. Vesicles* **2020**, DOI 10.1080/20013078.2019.1697028.
- 522 [21] J. Vitte, A. B. Diallo, A. Boumaza, A. Lopez, M. Michel, J. Allardet-Servent, S. Mezouar, Y.  
523 Sereme, J. M. Busnel, T. Miloud, F. Malergue, P. E. Morange, P. Halfon, D. Olive, M.  
524 Leone, J. L. Mege, *J. Infect. Dis.* **2020**, *222*, 1985.
- 525 [22] O. G. de Jong, M. C. Verhaar, Y. Chen, P. Vader, H. Gremmels, G. Posthuma, R. M.  
526 Schiffelers, M. Gucek, B. W. M. van Balkom, *J. Extracell. Vesicles* **2012**, *1*, DOI  
527 10.3402/jev.v1i0.18396.
- 528 [23] M. V. Veetil, B. Kumar, M. A. Ansari, D. Dutta, J. Iqbal, O. Gjyshi, V. Bottero, B.  
529 Chandran, *J. Virol.* **2016**, *90*, 3860.
- 530 [24] K. A. Walsh, S. Spillane, L. Comber, K. Cardwell, P. Harrington, J. Connell, C. Teljeur, N.  
531 Broderick, C. F. de Gascun, S. M. Smith, M. Ryan, M. O'Neill, *J. Infect.* **2020**, *81*, 847.
- 532 [25] M. Merad, J. C. Martin, *Nat. Rev. Immunol.* **2020**, *20*, 355.
- 533 [26] K. E. Bernstein, Z. Khan, J. F. Giani, D. Y. Cao, E. A. Bernstein, X. Z. Shen, *Nat. Rev.*  
534 *Nephrol.* **2018**, *14*, 325.
- 535 [27] I. E. Galani, N. Rovina, V. Lampropoulou, V. Triantafyllia, M. Manioudaki, E. Pavlos, E.  
536 Koukaki, P. C. Fragkou, V. Panou, V. Rapti, O. Koltsida, A. Mentis, N. Koulouris, S.  
537 Tsiodras, A. Koutsoukou, E. Andreakos, *Nat. Immunol.* **2021**, *22*, 32.
- 538 [28] P. C. Robinson, D. Richards, H. L. Tanner, M. Feldmann, *Lancet Rheumatol.* **2020**, *2*,  
539 e653.
- 540
- 541

542 **FIGURE LEGENDS**

543 **Table 1.** Demographic and clinical characteristics of the patient cohort.

544

545 **Figure 1.** Characterization of immune serum EVs in healthy controls and mild COVID-19  
546 patients. (A) Schematic outline of EVs profiling from denoted human samples. (B) Size  
547 distribution quantification of serum EVs from denoted human samples and different EV subsets,  
548 with size reference beads with a mixture of four modal sizes of 66 nm (small), 91 nm (medium),  
549 113 nm (large), 155 nm (extra-large). Representative side scatter histogram of size reference  
550 beads in (B) and total serum EVs from denoted human samples on the right. (C, D)  
551 Quantification of total serum EVs and CD45+ EVs in denoted human samples at days of  
552 reported symptom onset. (E) Spearman's rank correlation matrix of size distribution of serum  
553 EVs subsets between healthy donors and mild COVID-19 patients. One-way ANOVA,  $p < 0.05$  \*,  
554  $p < 0.01$  \*\*,  $p < 0.005$  \*\*\*.

555

556 **Figure 2.** Characterization of Sars-Cov-2 Spike S1+ serum EVs in healthy controls and mild  
557 COVID-19 patients. (A) Quantification of Spike S1+, Spike S1+CD31+ and CD31+ serum EVs in  
558 denoted human samples, dark blue (Spike S1+ EVs positive). (B) Size distribution quantification  
559 of serum EVs from denoted human samples and indicated EV subsets. (C) Bi-plot and principal  
560 component analysis of set of serum EVs markers defining healthy and mild COVID-19 status. (D)  
561 Spearman's rank correlation matrix of serum EVs subsets between healthy donors and mild  
562 COVID-19 patients. One-way ANOVA,  $p < 0.05$  \*,  $p < 0.01$  \*\*,  $p < 0.005$  \*\*\*.

563

564 **Figure 3.** Correlation of Sars-Cov-2 Spike S1+ serum EVs with host immune responses in  
565 healthy controls and mild COVID-19 patients. (A) Quantification of Sars-Cov-2 Spike S1+ and  
566 Sars-Cov-2 Spike S1+CD31+ EVs in denoted human samples at days after reported symptom  
567 onset. (B, C) Quantification of soluble Sars-Cov-2 specific immunoglobulins in denoted human  
568 samples at days after reported symptom onset. (D) Quantification of soluble interleukin-10  
569 levels in denoted human samples at days after reported symptom onset. (E) Spearman's  
570 correlation of level of Spike S1+ serum EVs to Spike S1+CD31+ EVs, soluble IgG1, IgG3 and  
571 interleukin-10 levels.

572

573 **Figure 4.** Mild COVID-19 patients derived serum EVs affect healthy PBMCs responses *ex vivo*  
574 (A) Schematic outline of *ex vivo* healthy PBMCs activation in the presence of PBS control and  
575 serum EVs from healthy donors and mild COVID-19 patients. (B-D) Quantification of different

576 subsets expansion, activation, cytokine production (T cells) (C, D) and class switch  
577 recombination (B cells) (B). One-way ANOVA,  $p < 0.05$  \*,  $p < 0.01$  \*\*,  $p < 0.005$  \*\*\*.

578

## 579 SUPPLEMENTARY FIGURE LEGENDS

580

581 **Figure S1.** Nanoflow control and experimental setup. (A) Representative nanoflow gating  
582 strategies of EVs, HEK293A derived EVs (control) and representative patient derived serum  
583 EVs. (B) Representative back gating strategies to determine size distribution of EV subsets  
584 using size reference beads with mixture of four modal sizes, 66 nm (small), 91 nm (medium),  
585 113 nm (large), 155 nm (extra-large). (C) Quantification of CD45<sup>+</sup> serum EVs in healthy controls  
586 and mild COVID-19 patients. (D) Quantification of size distribution of CD38<sup>+</sup>, IgA<sup>+</sup>, IgG<sup>+</sup> serum  
587 EVs in healthy controls and mild COVID-19 patients.

588

589 **Figure S2.** Binding specificity of Sars-CoV-2 Spike S1 antibodies. (A) Representative flow  
590 gating strategies of HEK293A co-transfected with GFP and Spike S1 plasmid after 24 hours. (B)  
591 Competition of anti-Spike S1 binding in HEK293A in (A) with addition of recombinant Spike S1  
592 proteins in denoted molar ratio. (C) Representative flow gating strategies of EVs derived from  
593 HEK293A co-transfected with GFP and Spike S1 plasmid after 24 hours and competition of anti-  
594 Spike S1 binding in EVs with addition of recombinant Spike S1 proteins in denoted molar ratio.

595

596 **Figure S3.** (A) Representative flow gating strategies of patient derived serum EVs for Spike S1  
597 and CD31. (B) Quantification of Spike S1<sup>+</sup>CD45<sup>+</sup>, Spike S1<sup>+</sup>CD38<sup>+</sup>, Spike S1<sup>+</sup>CD56<sup>+</sup>, Spike  
598 S1<sup>+</sup>IgA<sup>+</sup>, Spike S1<sup>+</sup>IgG<sup>+</sup>, Spike S1<sup>+</sup>CD66b<sup>+</sup> serum EVs in in healthy controls and mild COVID-19  
599 patients.

600

601 **Figure S4.** PCA plot clustering of serum EVs samples based on age (A) and sex (B).



**Table 1.** Demographic and clinical characteristics of the patient cohort.

|                                                          | <b>Healthy</b>  | <b>Mild COVID-19</b> |                |
|----------------------------------------------------------|-----------------|----------------------|----------------|
| No. of samples                                           | 17              | 20                   |                |
| Median age [years]                                       | 31              | 34                   |                |
| Gender (M/F)                                             | 7/10            | 11/9                 |                |
| Time since symptom onset (days)                          | -               | 11 ± 5.01996         |                |
| <b>Laboratories values</b>                               |                 |                      | <b>P value</b> |
| Hemoglobin(mean ± SD, [g/l])                             | 143.13 ± 11.76  | 81.35 ± 75.79        | 0.0028         |
| Absolute platelet count(mean ± SD, [G/l])                | 252 ± 50.71     | 243.25 ± 61.79       | ns             |
| Total white blood cell count mean ± SD, [G/l])           | 6.06 ± 1.73     | 5.13 ± 1.14          | ns             |
| Monocytes(mean ± SD, [G/l])                              | 0.45 ± 0.16     | 0.46 ± 0.1           | ns             |
| Neutrophils(mean ± SD, [G/l])                            | 3.61 ± 1.29     | 2.64 ± 0.91          | 0.0129         |
| Eosinophils(mean ± SD, [G/l])                            | 0.1 ± 0.05      | 0.12 ± 0.09          | ns             |
| Basophils(mean ± SD, [G/l])                              | 0.05 ± 0.01     | 0.03 ± 0.01          | 0.0015         |
| Lymphocytes(mean ± SD, [G/l])                            | 1.84 ± 0.56     | 1.85 ± 0.56          | ns             |
| CD3- CD56bright CD16dim NK cells (mean ± SD, [cells/ul]) | 18.47 ± 5.35    | 12.1 ± 5.7           | ns             |
| CD3- CD56dim CD16bright NK cells (mean ± SD, [cells/ul]) | 164.59 ± 119.87 | 248.25 ± 131.75      | ns             |
| CD4+ T cells(mean ± SD, [cells/ul])                      | 376.24 ± 468.03 | 780.3 ± 290.92       | 0.0029         |
| CD19+ B cells(mean ± SD, [cells/ul])                     | 101.41 ± 130.44 | 189.4 ± 103.36       | 0.0282         |
| C-reactive protein(mean ± SD, [mg/l])                    | 1.04 ± 0.97     | 1.74 ± 1.89          | ns             |
| LDH(mean ± SD, [U/l])                                    | 332.24 ± 53.88  | 342.39 ± 79.04       | ns             |
| IL-6(mean ± SD, [pg/ml])                                 | 0.47 ± 0.57     | 2.51 ± 4.24          | ns             |
| IL-10 (mean ± SD, [pg/ml])                               | 1.15 ± 1.3      | 1.64 ± 2.19          | ns             |
| IFN $\gamma$ (mean ± SD, [pg/ml])                        | 0.88 ± 1.68     | 1.89 ± 2.64          | ns             |
| TNF $\alpha$ (mean ± SD, [pg/ml])                        | 7.32 ± 3.04     | 8.36 ± 3.49          | ns             |
| Anti-CoV-2 IgA(mean ± SD, [ $\mu$ g/mL])                 | 0.34 ± 0.18     | 4.85 ± 7.2           | 0.0144         |
| Anti-CoV-2 IgG(mean ± SD, [ $\mu$ g/mL])                 | 0.27 ± 0.15     | 1.03 ± 0.92          | 0.0019         |
| <b>Comorbidities</b>                                     |                 |                      |                |
| Hypertonia - no. (%)                                     | -               | -                    |                |
| Diabetes - no. (%)                                       | -               | -                    |                |
| Heart disease - no. (%)                                  | -               | 1 (5%)               |                |
| Lung disease - no. (%)                                   | -               | -                    |                |
| Malignancy - no. (%)                                     | -               | -                    |                |
| Immunosuppression - no. (%)                              | -               | -                    |                |
| Kidney disease - no. (%)                                 | -               | -                    |                |
| Cerebrovascular disease - no. (%)                        | -               | -                    |                |
| M Crohn - no. (%)                                        | -               | 1 (5%)               |                |
| Allergic asthma - no. (%)                                | -               | 2 (10%)              |                |
| Hypothyreose - no. (%)                                   | 1 (6%)          | 3 (15%)              |                |

**A**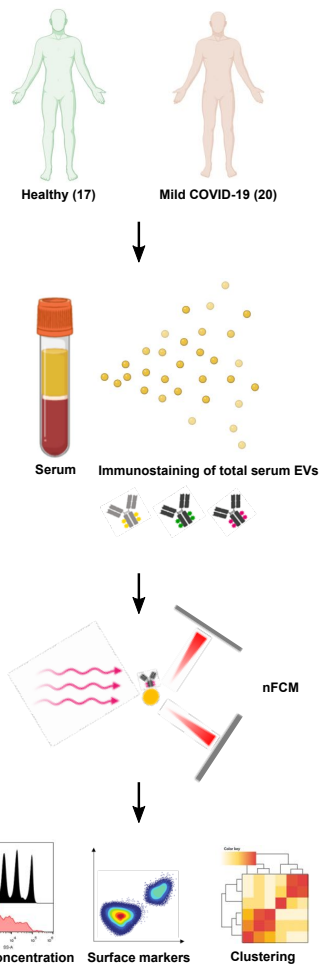**B**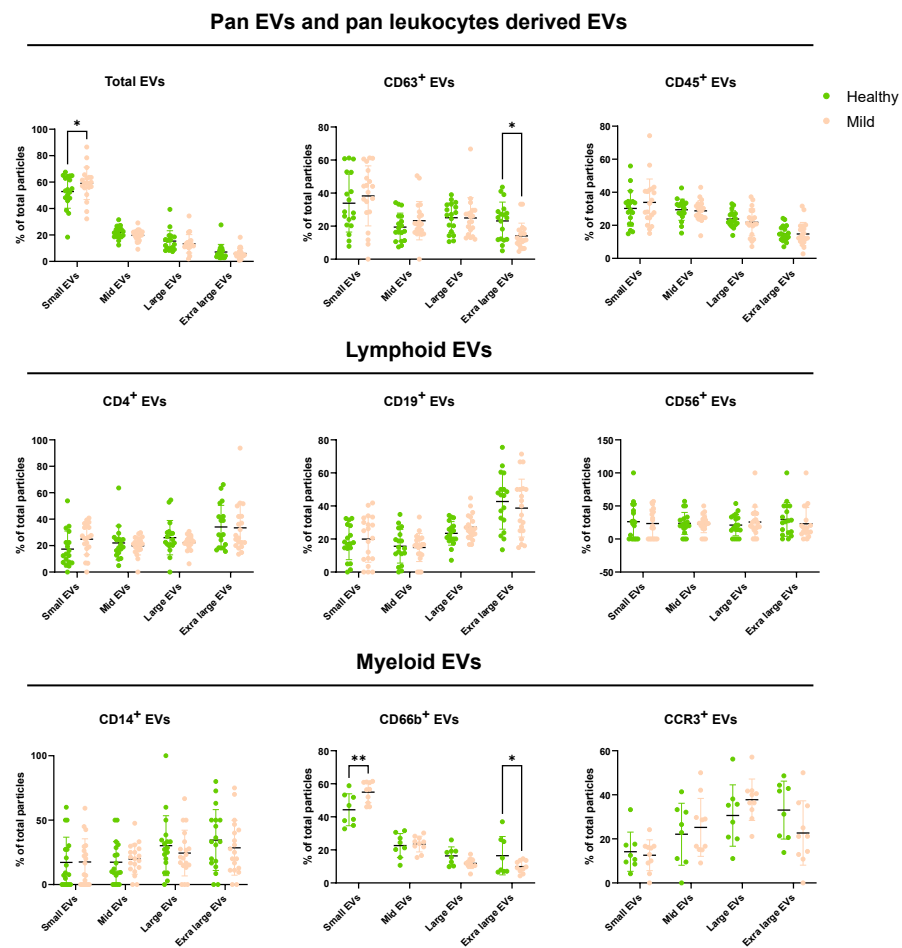**C**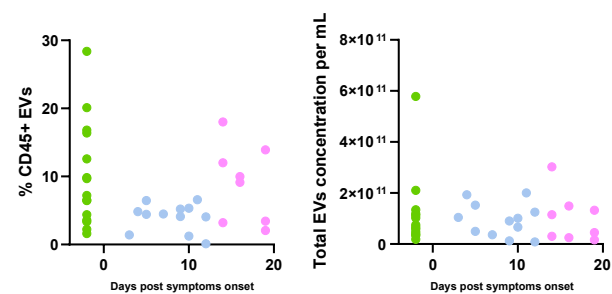**D**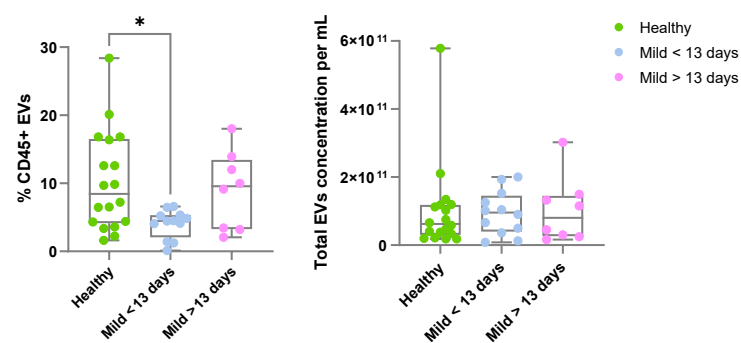**E**

### EVs subset size correlation

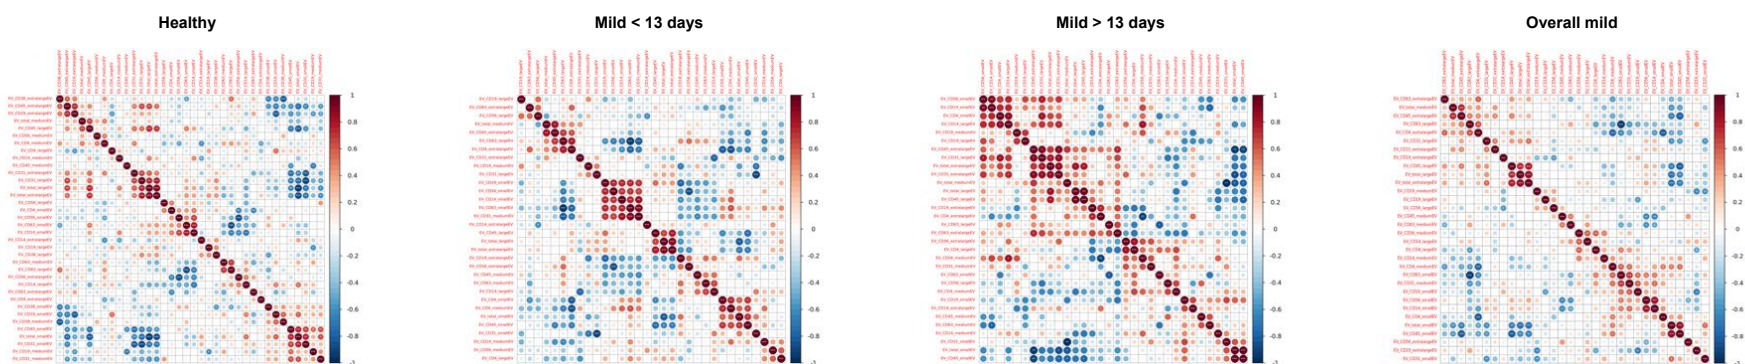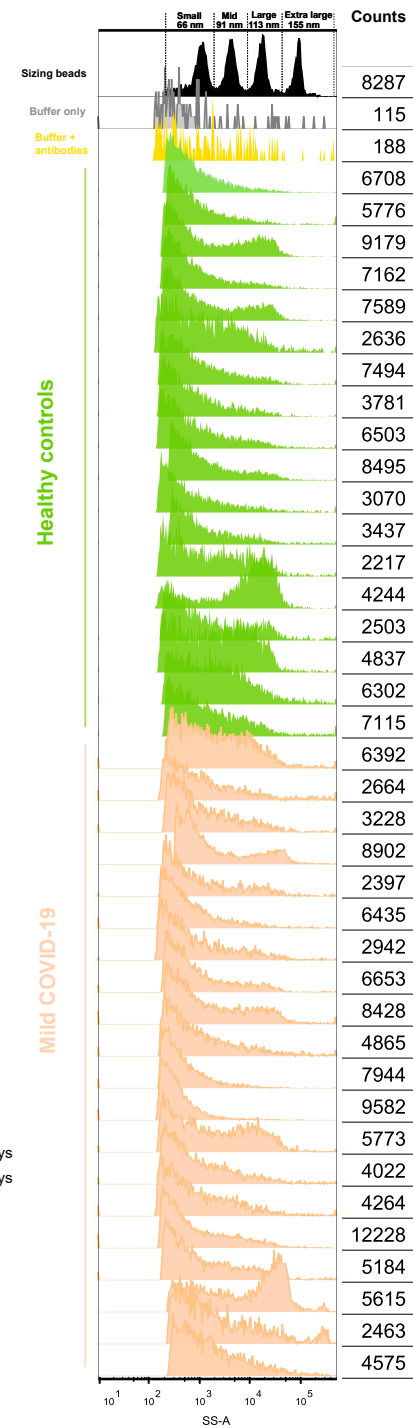

**A**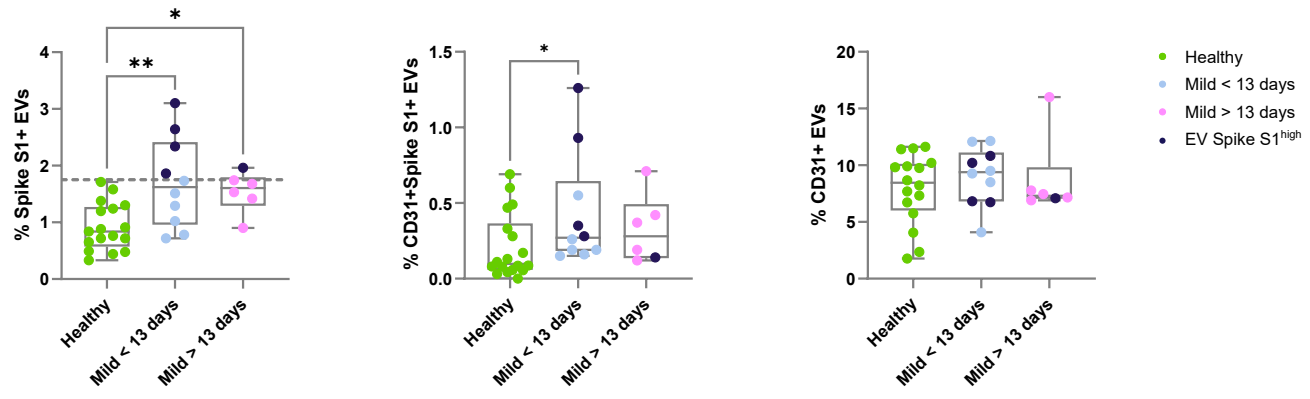**B**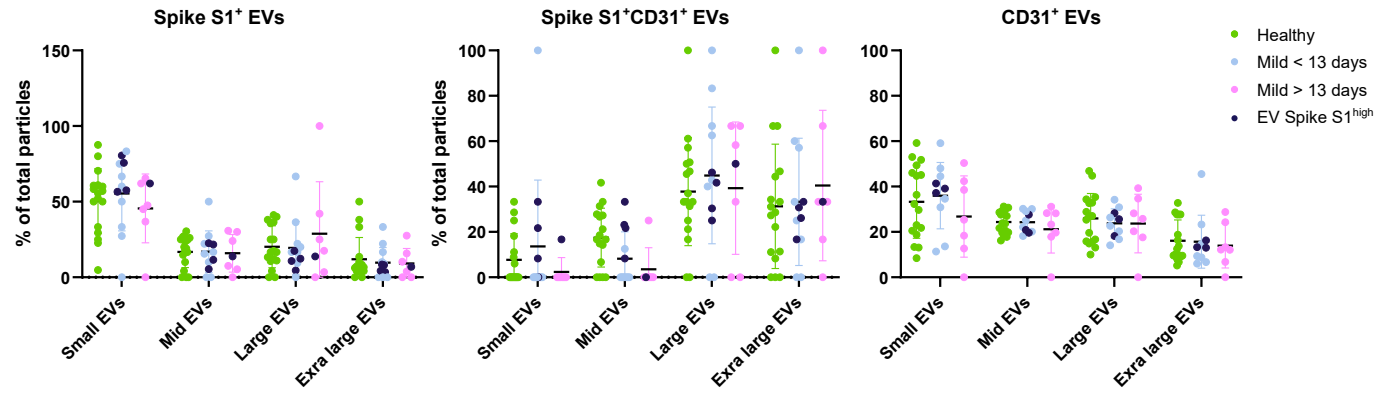**C**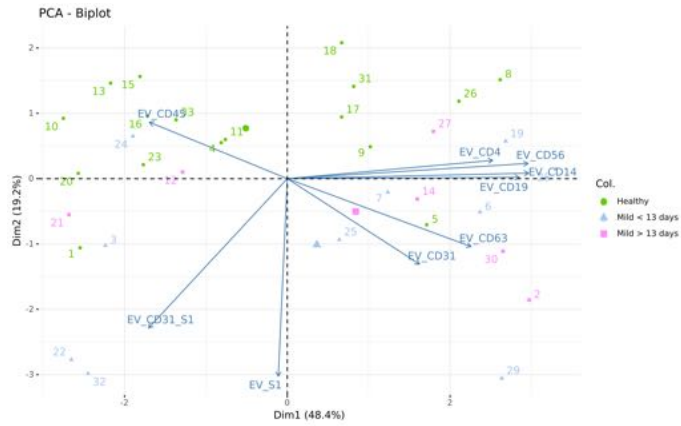**D**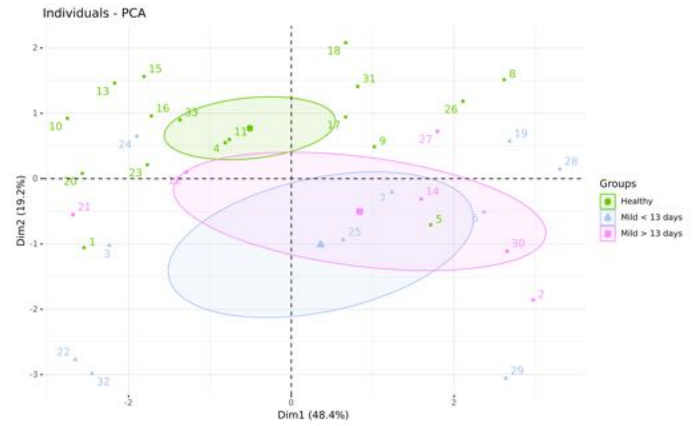**E****EVs subsets correlation**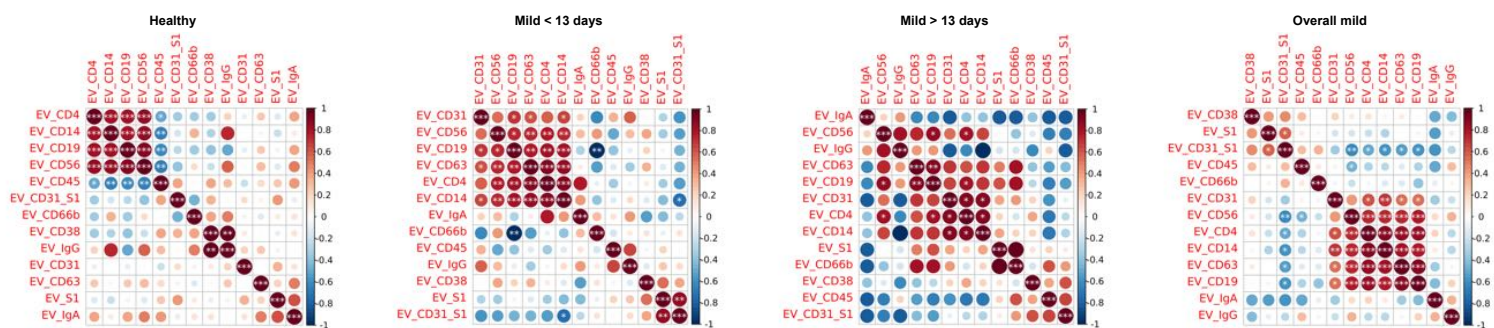

**A**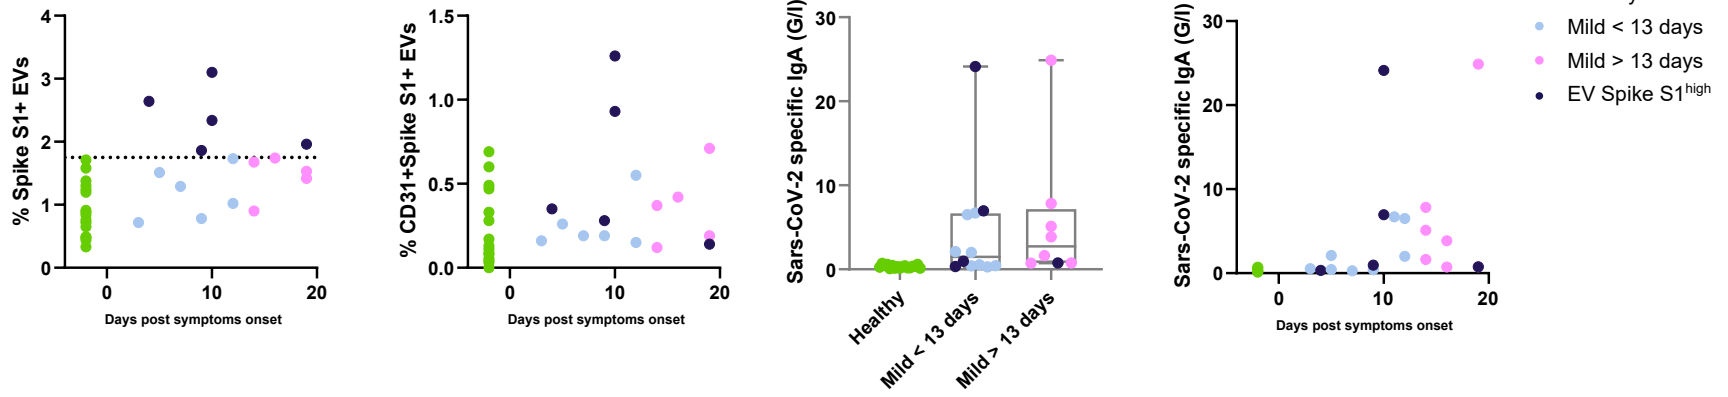**B**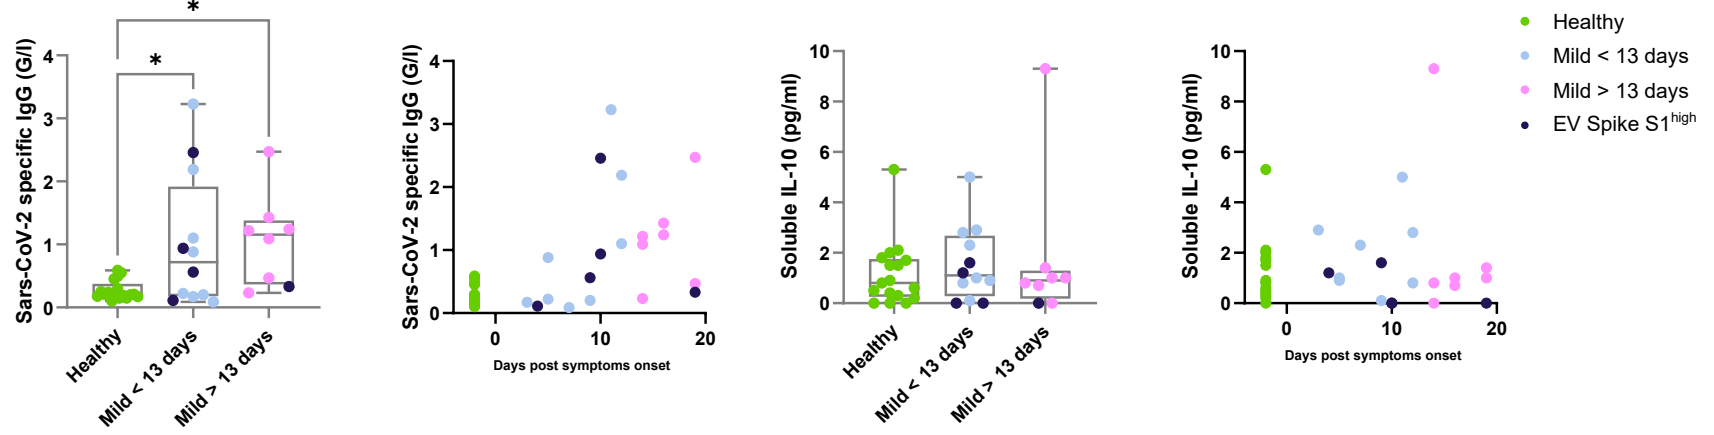**C**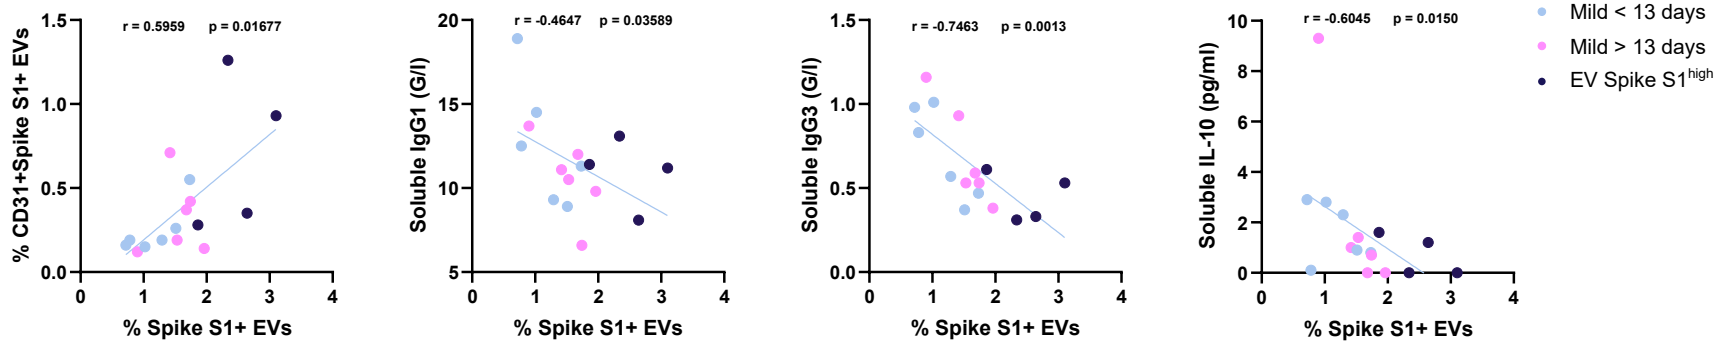

A

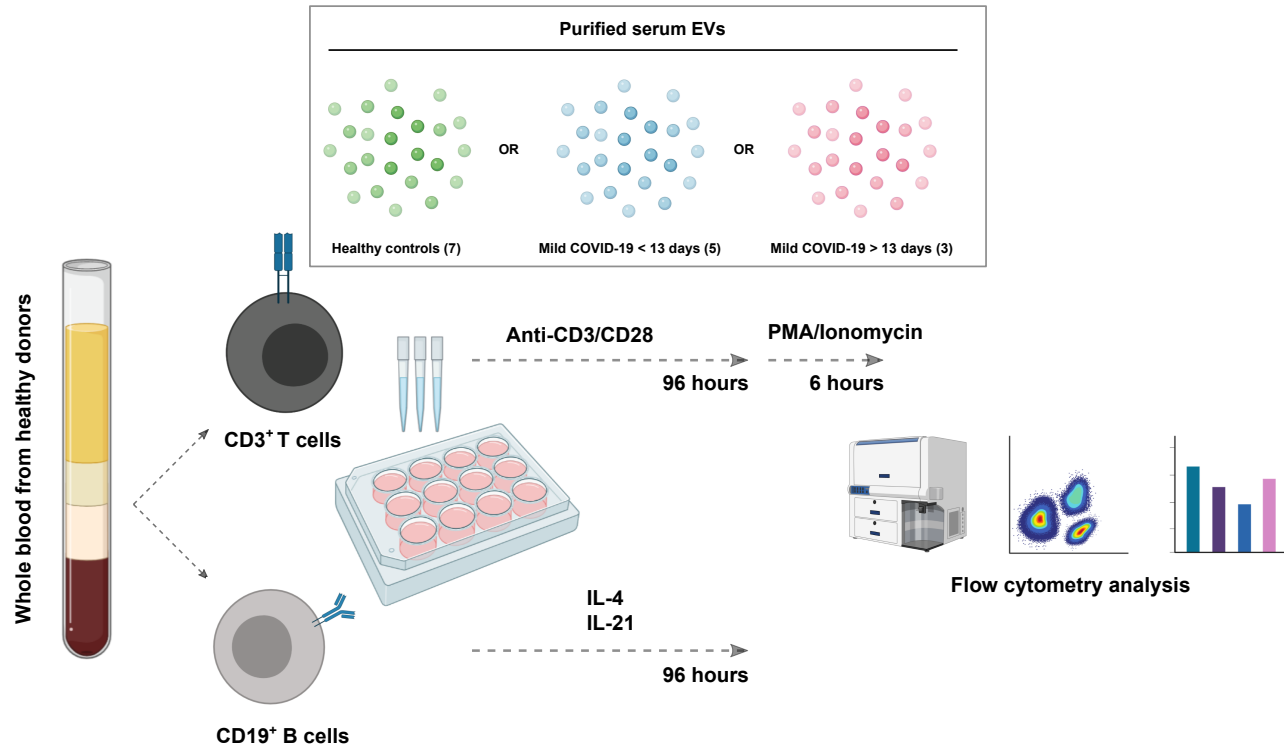

B

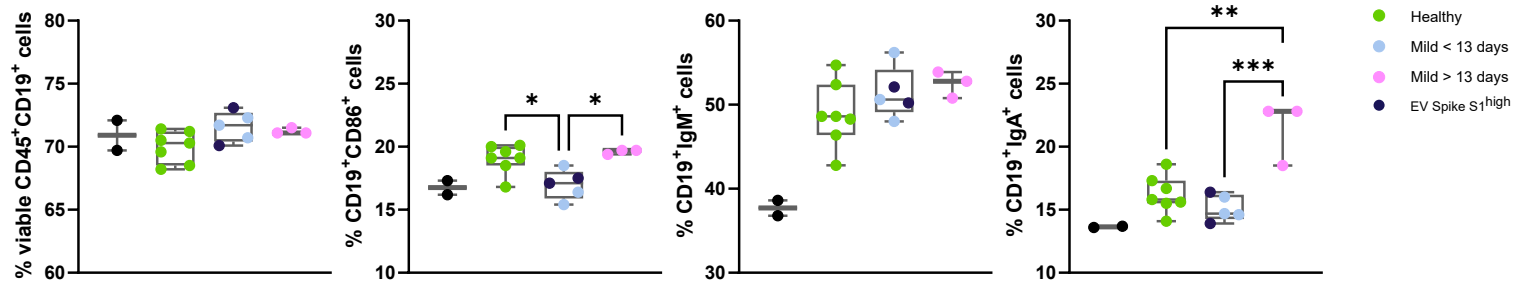

C

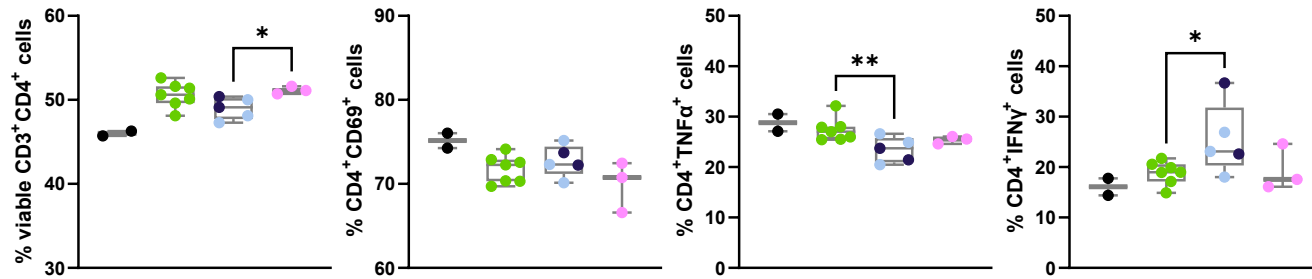

D

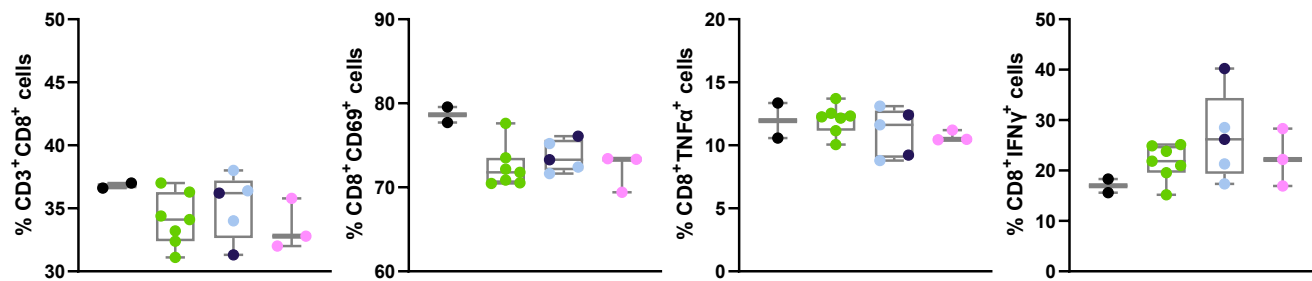

Source: https://medrxiv.org/content/medrxiv/early/2022/01/19/2022.01.19.22269529.full.pdf
